# Supplementary material for: CoP QD anchored carbon skeleton modified CdS nanorods as a co-catalyst for photocatalytic hydrogen production
Source: Royal Society of Chemistry journal article supplement (doi:10.1039/d0nr05268j), 2020-01-01
Supplement: d0nr05268j1.pdf [file d0nr05268j1.pdf]

## Supporting Information

### **CoP QDs with carbon skeleton as co-catalysts modified CdS nanorods for photocatalytic hydrogen production**

Qianqian Sun,<sup>a</sup> Zebin Yu,<sup>\*a</sup> Ronghua Jiang,<sup>b</sup> Yanping Hou,<sup>a,c</sup> Lei Sun,<sup>d</sup> Lun Qian,<sup>a</sup>

Fengyuan Li,<sup>a</sup> Mingjie Li,<sup>a</sup> Qi Ran,<sup>a</sup> Heqing Zhang<sup>a</sup>

<sup>a</sup> School of Resources, Environment and Materials, Guangxi University, Nanning  
530004, P. R. China.

<sup>b</sup> School of Chemical and Environmental Engineering, Shaoguan University, Shaoguan  
512005, P. R. China.

<sup>c</sup> Guangxi Bossco Environmental Protection Technology Co., Ltd, Nanning 530007, P.  
R. China.

<sup>d</sup> College of Chemical Engineering and Technology, Hainan University, Haikou  
570228, P. R. China.

\* Corresponding Author E-mail: xxzx7514@hotmail.com, yuzebin@gxu.edu.cn (Z Yu)

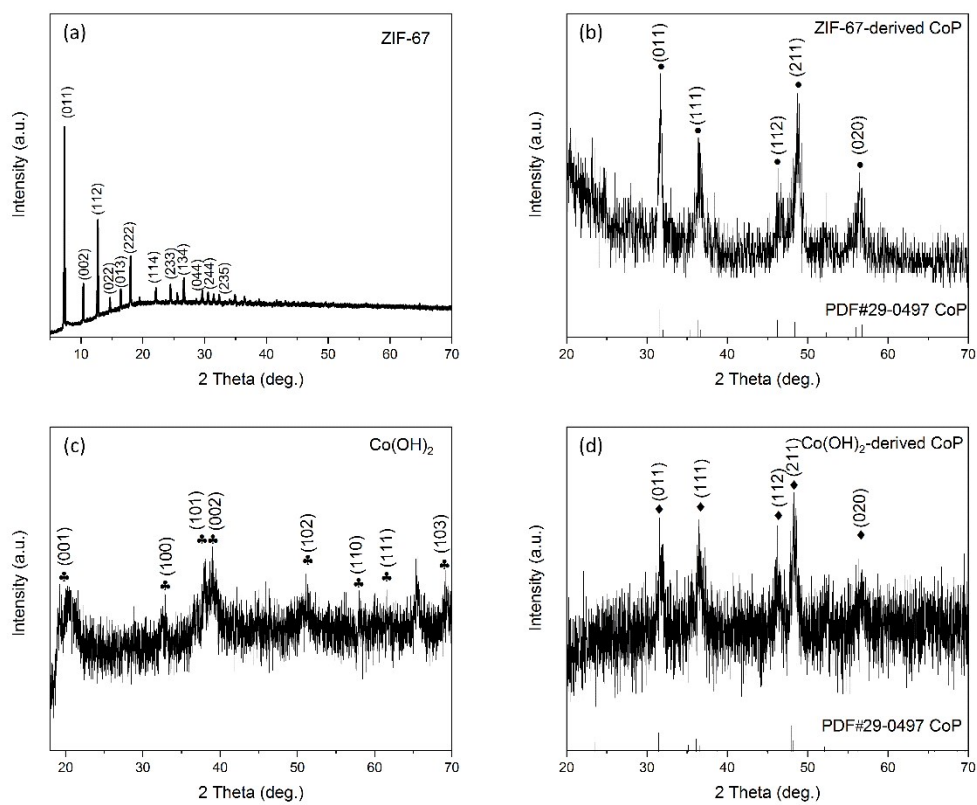

**Fig. S1** XRD patterns of the ZIF-67 (a), ZIF-67-derived CoP (b), Co(OH)<sub>2</sub> (c) and Co(OH)<sub>2</sub>-derived CoP (d).

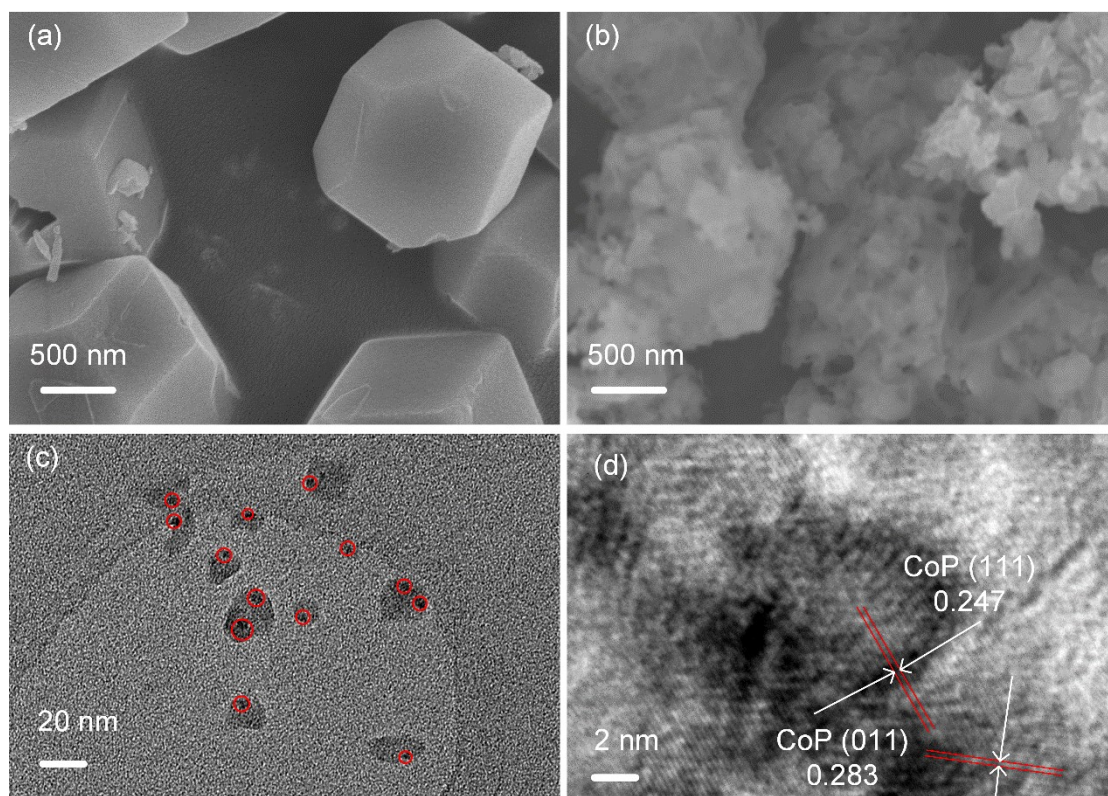

**Fig. S2** FESEM images of the ZIF-67 (a) and ZIF-67-derived CoP (b). TEM and HRTEM images of the ZIF-67-derived CoP (c, d).

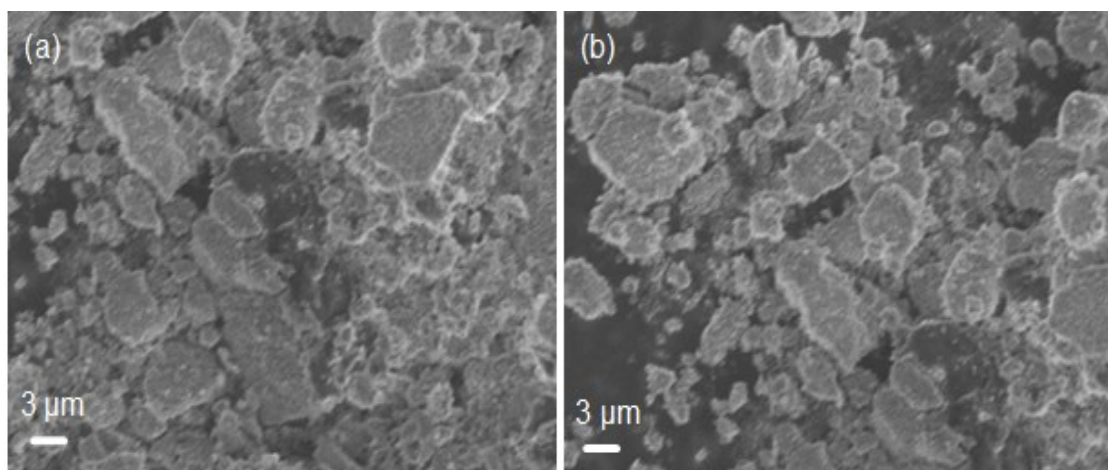

**Fig. S3** FESEM images of the Co(OH)<sub>2</sub> (a) and Co(OH)<sub>2</sub>-derived CoP (b).

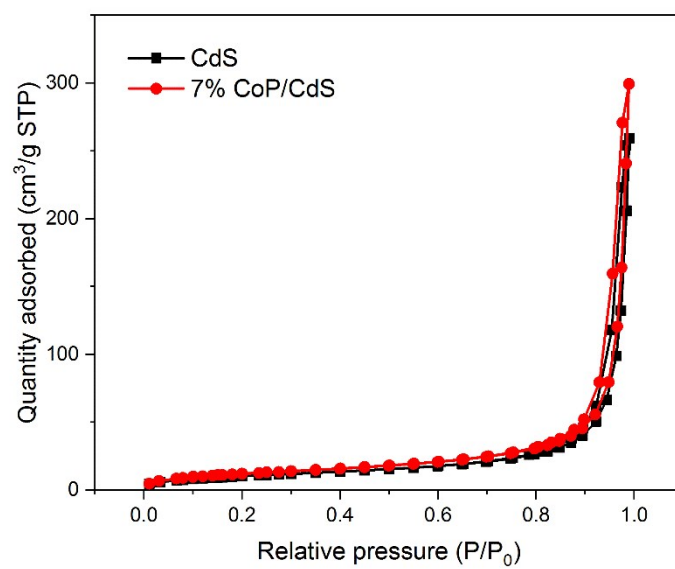

**Fig. S4** N<sub>2</sub> adsorption/desorption isotherms of CdS and 7% CoP/CdS.

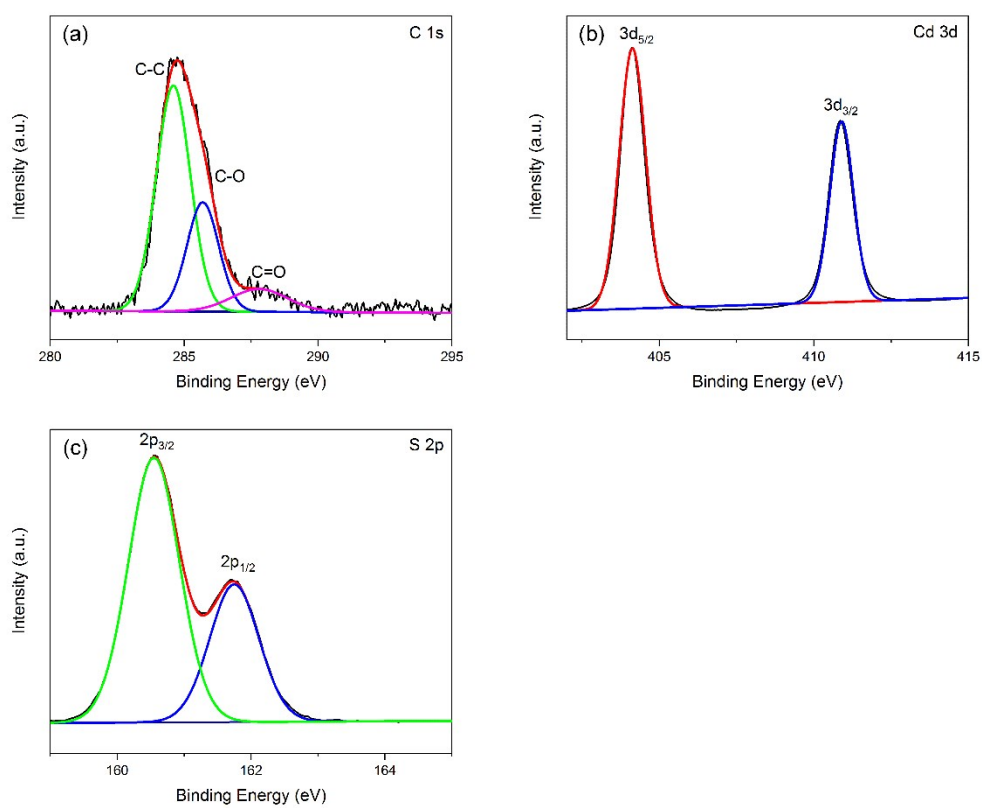

**Fig. S5** High-resolution XPS of spectra of C 1s (a), Cd 3d (b) and S 2p (c) of the bare CdS.

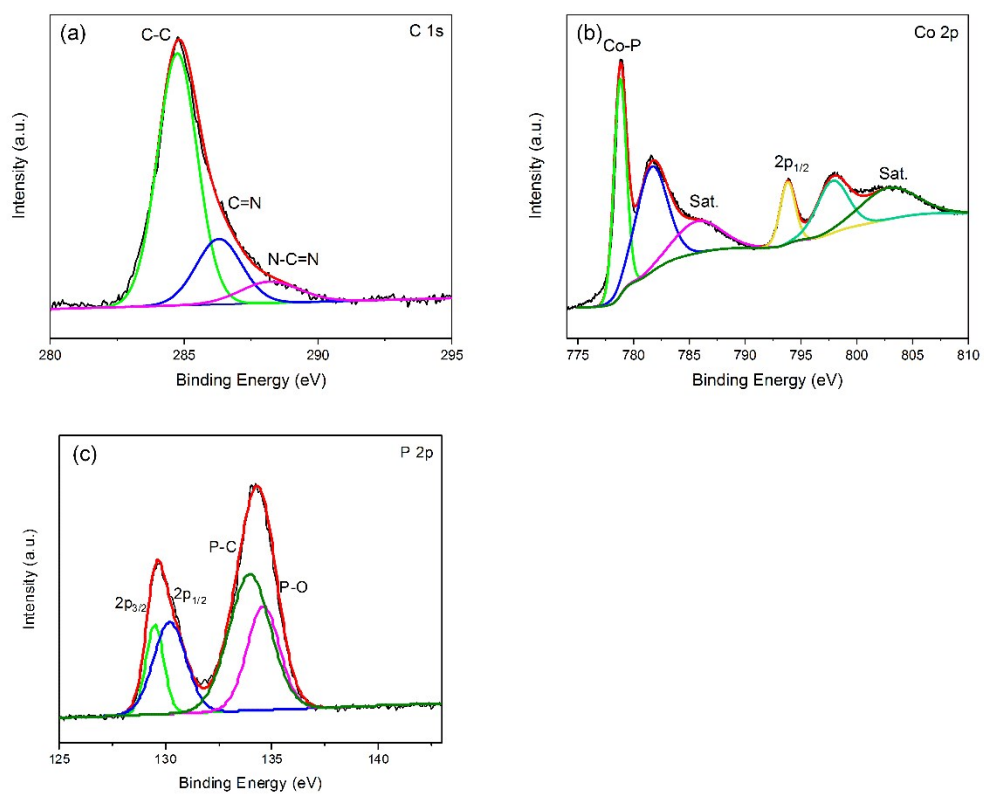

**Fig. S6** High-resolution XPS of spectra of C 1s (a), Co 2p (b) and P 2p (c) of the ZIF-67-derived CoP.

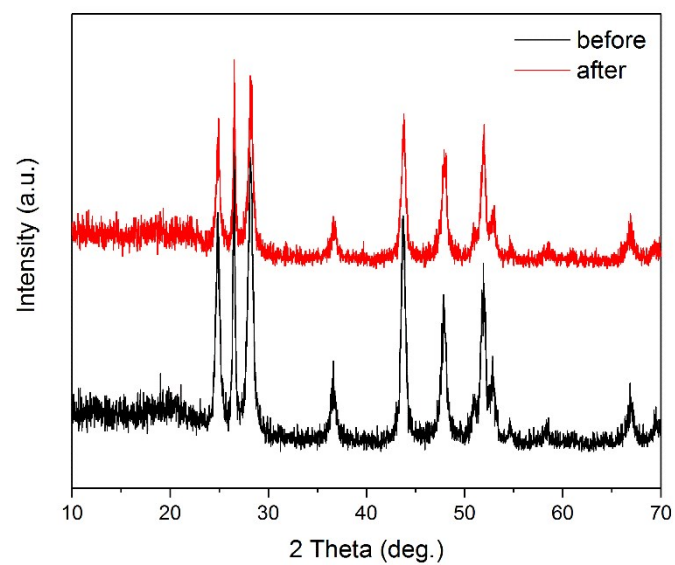

**Fig. S7** XRD patterns of the 7% CoP/CdS photocatalyst before and after stability test of photocatalytic  $H_2$  production under visible light irradiation.

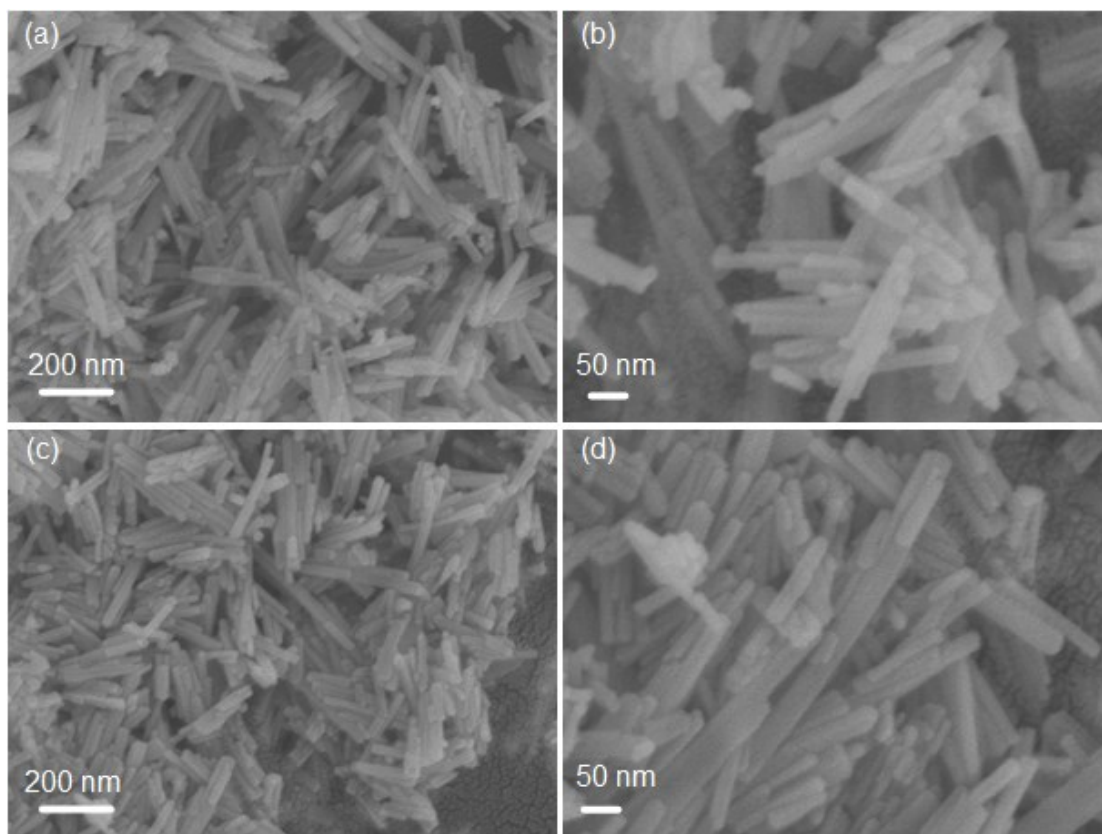

**Fig. S8** FESEM images of the 7% CoP/CdS photocatalyst before (a, b) and after (c, d) stability test of photocatalytic H<sub>2</sub> production under visible light irradiation.

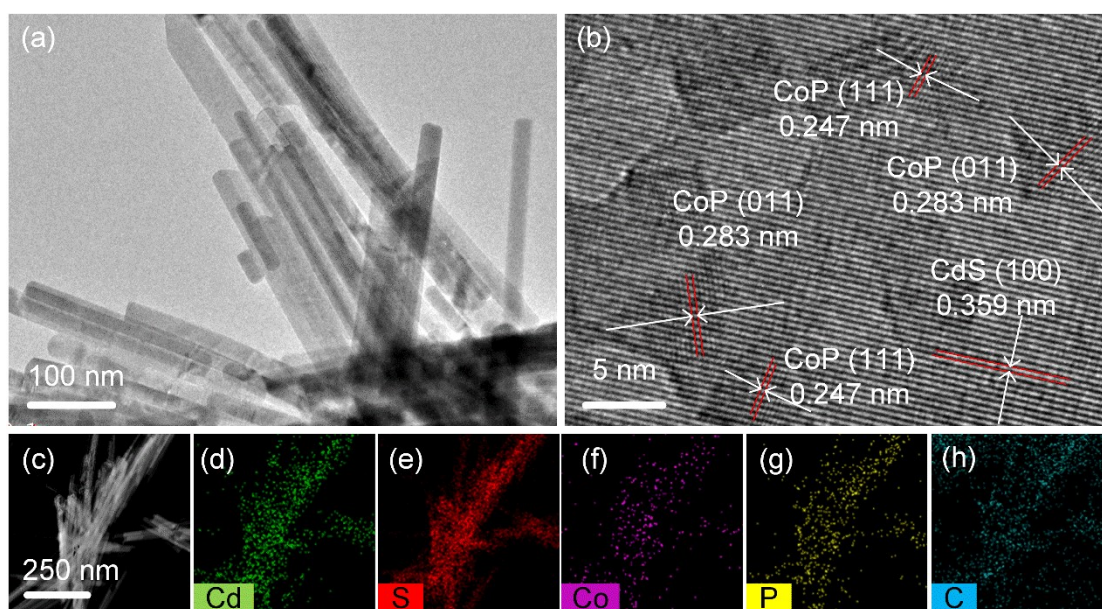

**Fig. S9** (a) TEM and (b) HRTEM images, (c-h) STEM images and EDS mappings of the 7% CoP/CdS photocatalyst after stability test of photocatalytic H<sub>2</sub> production under visible light irradiation.



Table S1 Comparison of different co-catalysts decorated CdS NRs.

| <b>Photocatalyst</b>   | <b>H<sub>2</sub> production</b>              | <b>Reference</b> |
|------------------------|----------------------------------------------|------------------|
| CdS/Co@NC              | 21.8 mmol h <sup>-1</sup> g <sup>-1</sup>    | 1                |
| MoS <sub>2</sub> /CdS  | 12.38 mmol g <sup>-1</sup> h <sup>-1</sup>   | 2                |
| NiSe <sub>2</sub> /CdS | 61.522 mmol g <sup>-1</sup> (5 h)            | 3                |
| NixP/CdS               | 69.2 mmol h <sup>-1</sup> g <sup>-1</sup>    | 4                |
| WS <sub>2</sub> -CdS   | 19.2 mmol h <sup>-1</sup> g <sup>-1</sup>    | 5                |
| WPS/CdS                | 123.257 mmol g <sup>-1</sup> (5 h)           | 6                |
| CoS <sub>2</sub> /CdS  | 58 mmol h <sup>-1</sup> g <sup>-1</sup>      | 7                |
| CoOx@N, S-C/CdS        | 40.1 mmol h <sup>-1</sup> g <sup>-1</sup>    | 8                |
| Pt/CdS                 | 24.15 mmol h <sup>-1</sup> g <sup>-1</sup>   | 9                |
| CoP-CdS                | 13.785 mmol h <sup>-1</sup> g <sup>-1</sup>  | 10               |
| CoP/CdS                | 104.947 mmol h <sup>-1</sup> g <sup>-1</sup> | This work        |

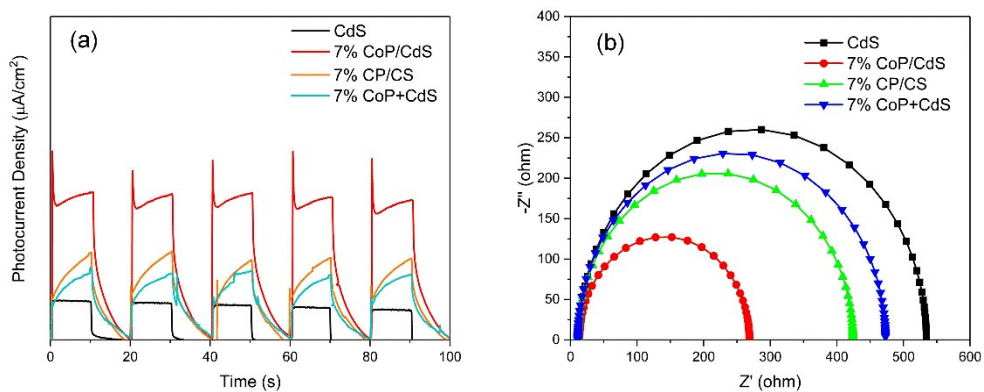

**Fig. S10** Transient photocurrent density of CdS, 7% CoP/CdS, 7% CP/CS and 7% CoP+CdS (a). EIS spectra of CdS, 7% CoP/CdS, 7% CP/CS and 7% CoP+CdS (b).

## References

1. X. Meng, C. Zhang, C. Dong, W. Sun, D. Ji and Y. Ding, *Chem. Eng. J.*, 2020, **389**, 124432.
2. C. Feng, Z. Chen, J. Hou, J. Li, X. Li, L. Xu, M. Sun and R. Zeng, *Chem. Eng. J.*, 2018, **345**, 404-413.
3. G. Wang and Z. Jin, *Appl. Surf. Sci.*, 2019, **467-468**, 1239-1248.
4. S. Zhu, J. Wang, Y. He, Z. Yu, X. Wang and W. Su, *Catal. Sci. Technol.*, 2019, **9**, 5394-5400.
5. B. Archana, N. Kottam, S. Nayak, K. B. Chandrasekhar and M. B. Sreedhara, *J. Phys. Chem. C*, 2020, DOI: 10.1021/acs.jpcc.0c03411.
6. Q. Jian, X. Hao, Z. Jin and Q. Ma, *Phys. Chem. Chem. Phys.*, 2020, **22**, 1932-1943.
7. J. Tang, B. Gao, J. Pan, L. Chen, Z. Zhao, S. Shen, J.-K. Guo, C.-T. Au and S.-F. Yin, *Appl. Catal., A*, 2019, **588**, 117281.
8. J. Wang, Q. Xu, M. Liu, K. Wang, Z. Wang and P. Qu, *Sustain. Energ. Fuels*, 2020, **4**, 1954-1962.
9. S. Liu, Z. Guo, X. Qian, J. Zhang, J. Liu and J. Lin, *Sustain. Energ. Fuels*, 2019, **3**, 1048-1054.
10. J. Wang, P. Wang, C. Wang and Y. Ao, *Int. J. Hydrogen Energy*, 2018, **43**, 14934-14943.
